# Supplementary material for: OsRE1 interacts with OsRIP1 to regulate rice heading date by finely modulating Ehd1 expression
Source: PubMed Central journal article supplement — Plant Biotechnol J. 2020 Aug 28;19(2):300–10. doi: 10.1111/pbi.13462 (PMC7868965; doi:10.1111/pbi.13462), 2020-08-28
Supplement: PBI-19-300-s001.pdf [file PBI-19-300-s001.pdf]

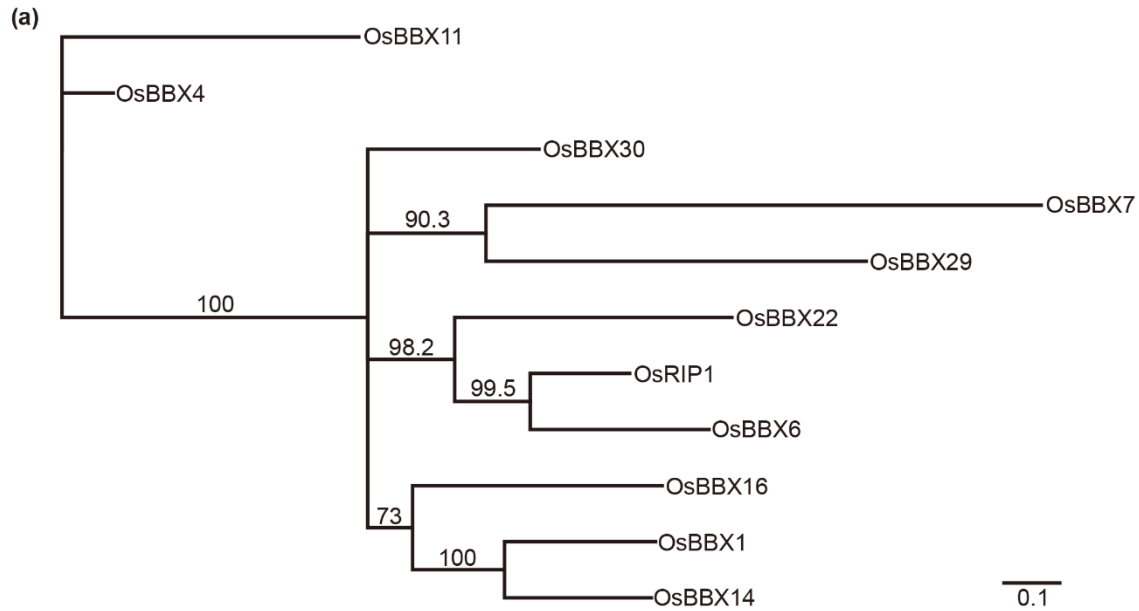

(b)

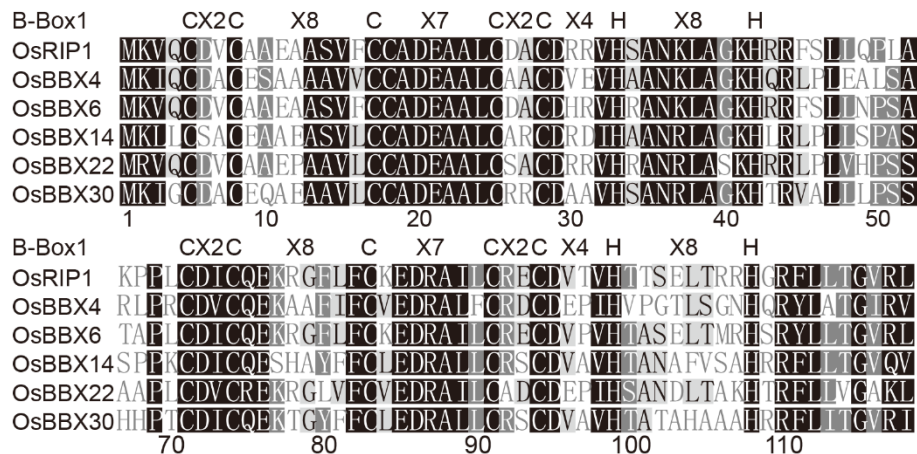

**Supplemental Figure 1.** Phylogenetic analysis of BBX family proteins in rice.

(a) Phylogenetic tree of OsRIP1 and its rice homologs. Tree was built using maximum likelihood analysis and a bootstrap of 1000 replications. Numbers on branches are consistency support rates for each clade. Scale bar indicates the average number of amino acid substitutions per site.

(b) Sequence alignments of the B-box 1 and B-box 2 domains. Identical, conserved and similar amino acid blocks are shaded in black, charcoal gray, and gray, respectively.

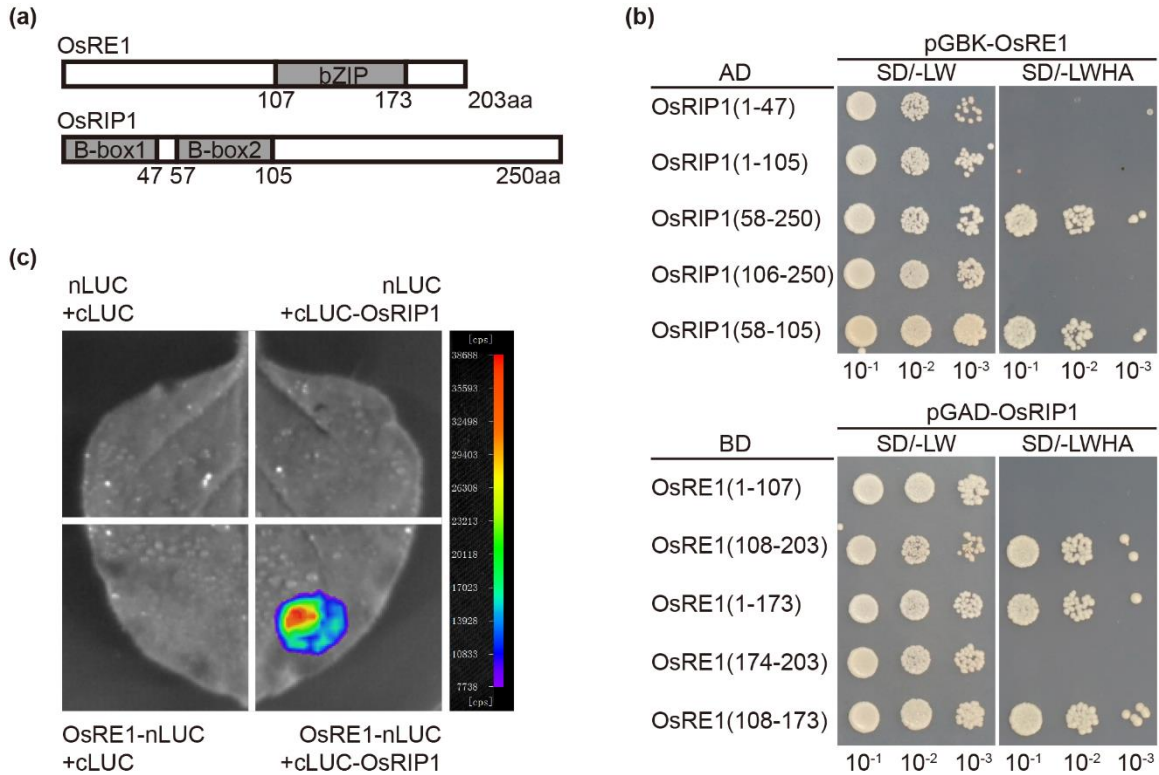

**Supplemental Figure 2.** OsRE1 physically interacts with OsRIP1.

(a) Schematic domain structures of OsRE1 and OsRIP1 proteins.

(b) Y2H assay showing the interaction analysis between series of truncated OsRE1 and OsRIP1 fragments. OsRE1 fragment (amino acids 108-173) and OsRIP1 fragment (amino acids 58-105) are necessary for the interaction between OsRE1 and OsRIP1. AD, activation domain. BD, binding domain.

(c) LCI assay showing the interaction of OsRE1 and OsRIP1 in leaves of *N. benthamiana*. The fluorescence signal intensity represents the level of interaction activity.

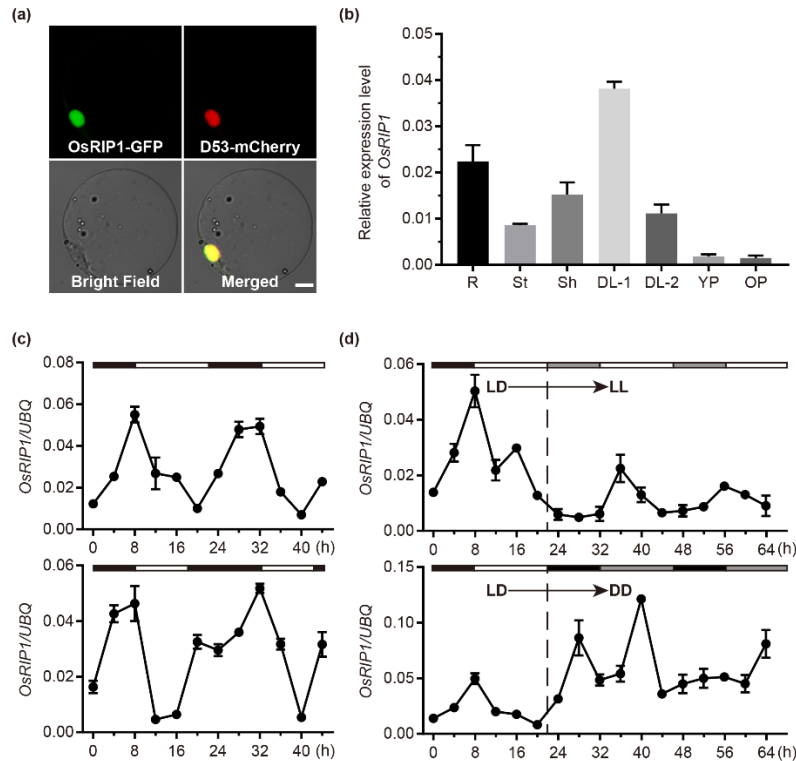

**Supplemental Figure 3.** Expression profiles and subcellular localization of *OsRIP1*.

(a) Subcellular localization of *OsRIP1*. D53-mCherry protein was used as a nuclear marker. Scale bar, 10  $\mu\text{m}$ .

(b) qRT-PCR analysis of *OsRIP1* expression levels in different tissues. R, root; St, stem; Sh, leaf sheath; DL-1, uppermost leaves; DL-2, second uppermost leaves; YP, young panicles; OP, old panicles. Values are means  $\pm$  SD;  $n = 3$ .

(c) Rhythmic expression of *OsRIP1* in second uppermost leaves under LD (14 h light/10 h darkness) and SD conditions (10 h light/14 h darkness). Rice *UBIQUITIN* gene was used as the internal control. Values are means  $\pm$  SD;  $n = 3$ .

(d) Expression analysis of *OsRIP1* in second uppermost leaves under continuous light (LL) and continuous darkness (DD) conditions. The plants were grown in growth chambers under LD conditions for 30 days and then transferred to LL or DD conditions for 2 days. Black and white bars indicate darkness and light, respectively. gray bars represent the subjective darkness in DD and subjective light in LL. Rice *UBIQUITIN* gene was used as the internal control. Values are means  $\pm$  SD;  $n = 3$ .

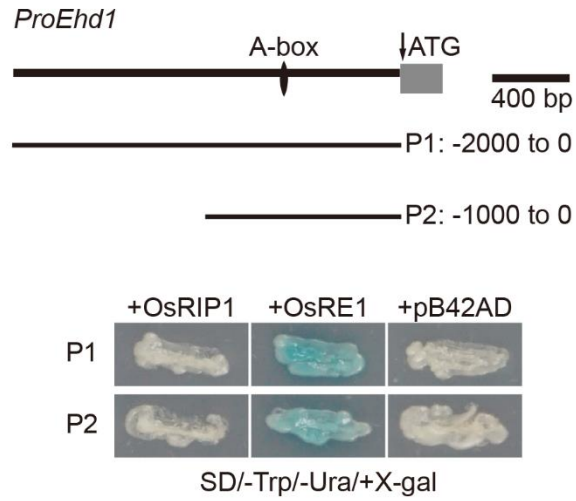

**Supplemental Figure 4.** OsRIP1 cannot bind to the promoter of *Ehd1*.in Y1H assay.

The promoter of *Ehd1* was divided into two fragments (P1 to P2). An empty vector was used as the negative control. OsRE1 was used as the positive control. Yeast was grown on Synthetic Dropout (SD) medium containing X-gal and lacking Trp/Ura.

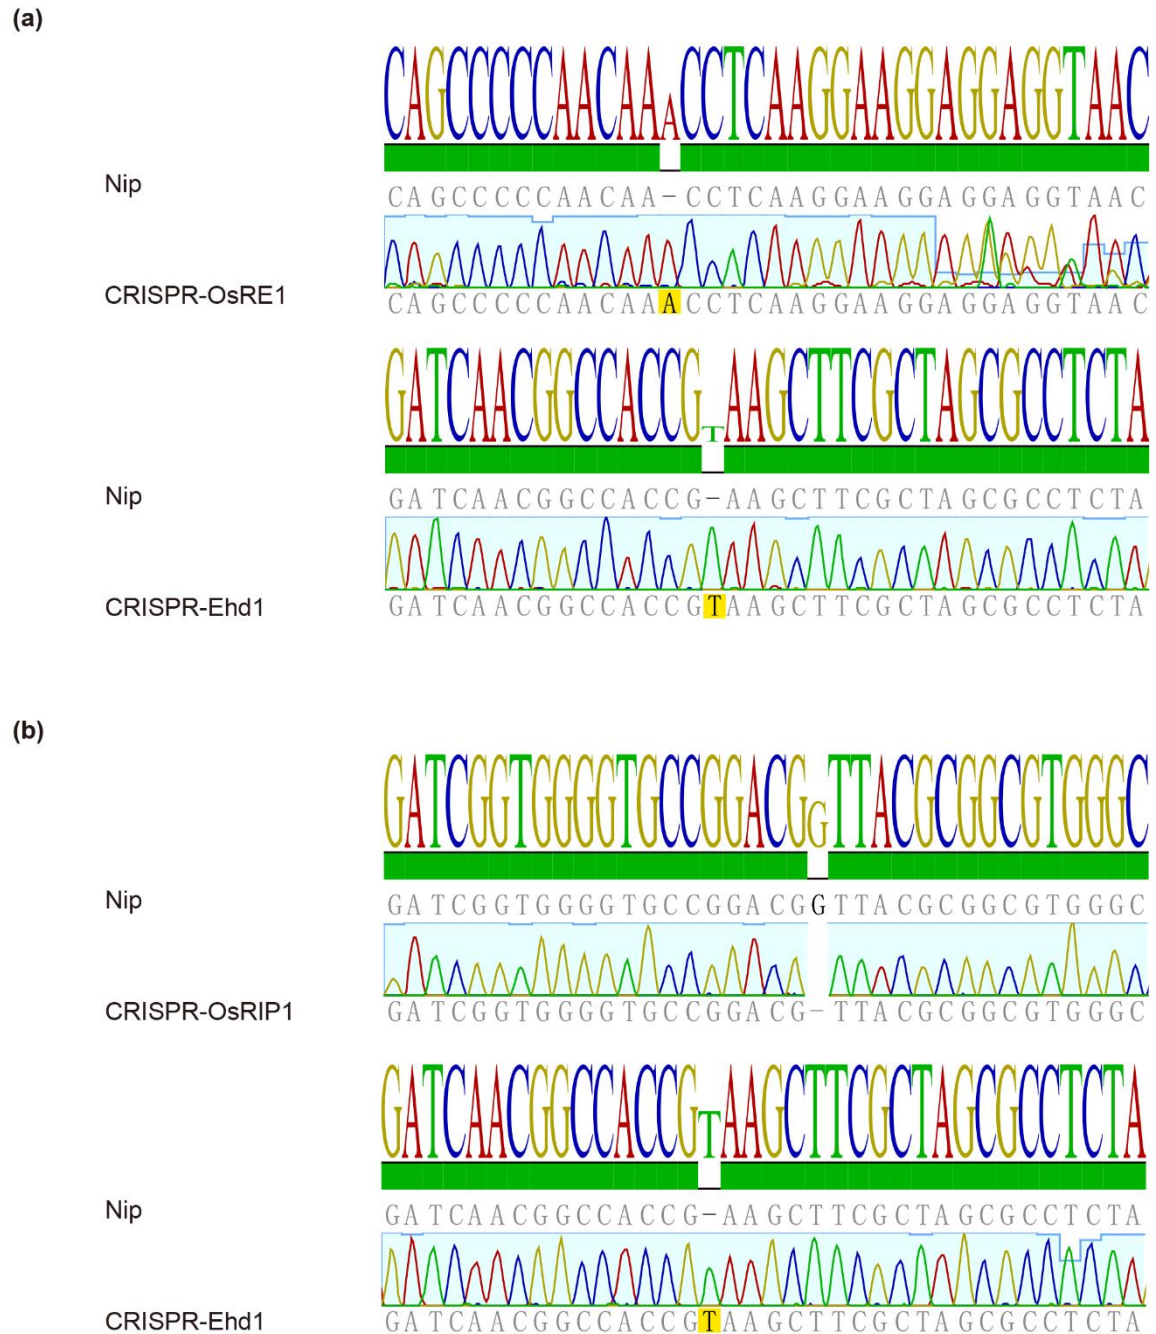

**Supplemental Figure 5.** Sequencing results of mutant sites in transgenic plants. Sequences were downloaded and aligned using Geneious (v4.8.5). Deleted nucleotides are depicted as dashes, inserted nucleotides are highlighted in yellow.

(a) Sequencing Results of Mutant Sites in *Osre1 ehd1* mutant.

(b) Sequencing Results of Mutant Sites in *Osrip1 ehd1* mutant.

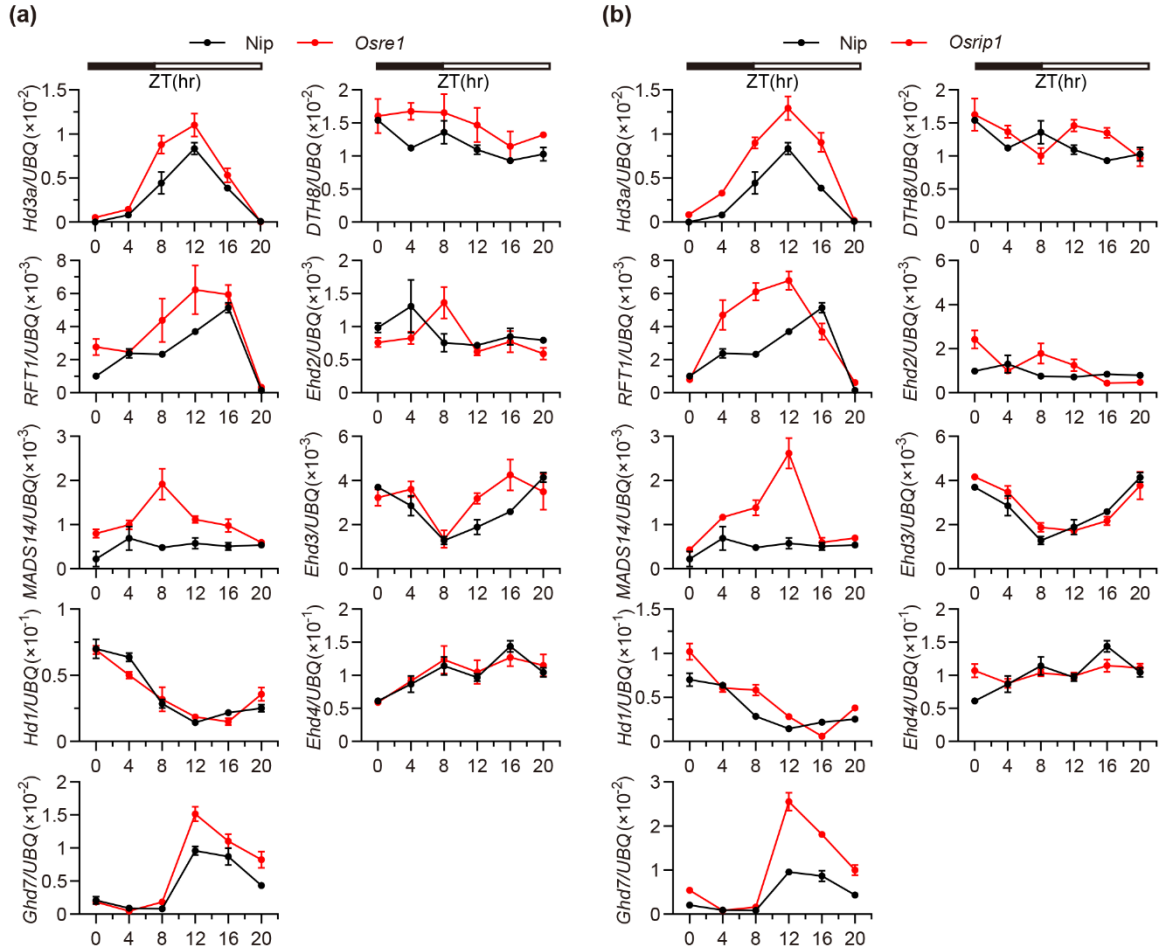

**Supplemental Figure 6.** Rhythmic expression patterns of genes related to heading date in Nipponbare, *Osre1* or *Osrip1* under LD conditions. Plants were grown in growth chambers under LD (14 h light /10 h darkness) conditions for 50 days. Black and white boxes denote dark and light periods, respectively. Rice *UBIQUITIN* gene was used as the internal control. Values are means  $\pm$  SD;  $n = 3$ . ZT, Zeitgeber time.

(a) Expression patterns of genes related to heading date in Nip and *Osre1*.

(b) Expression patterns of genes related to heading date in Nip and *Osrip1*.



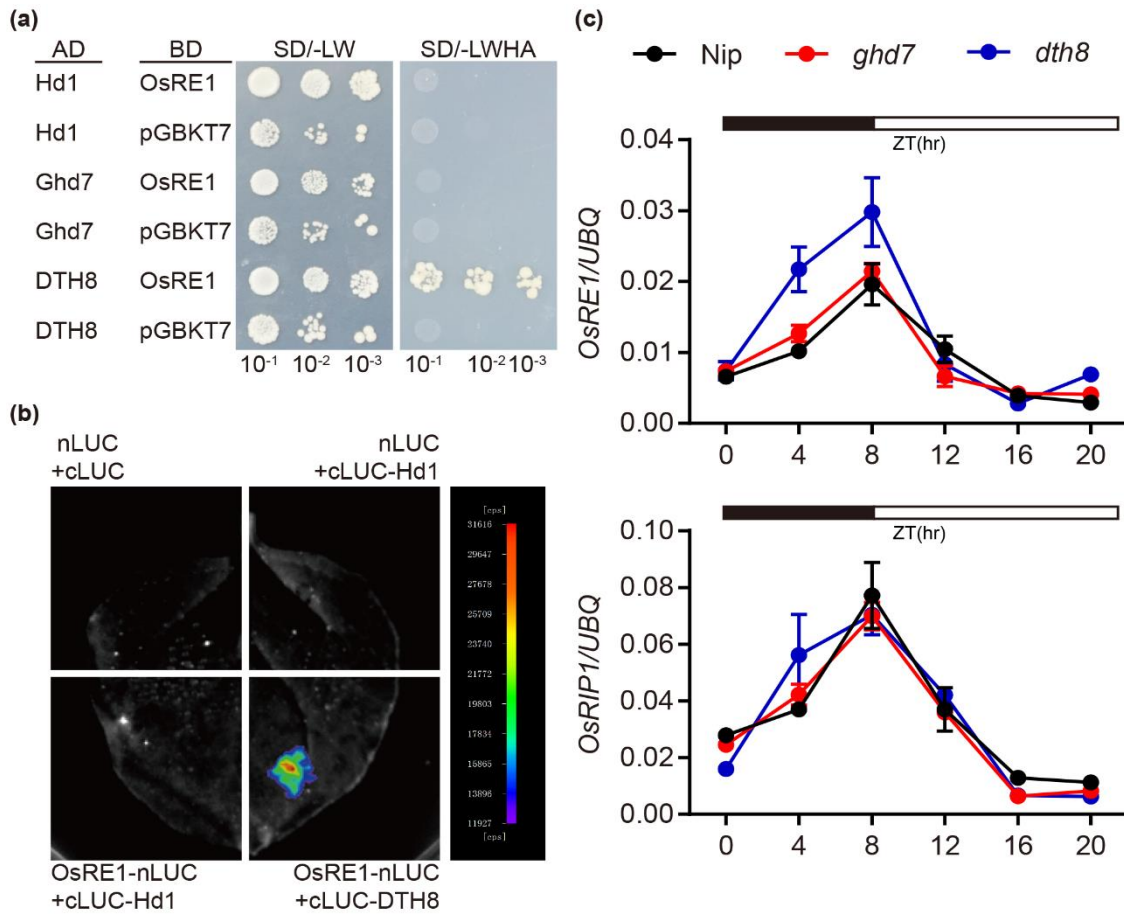

**Supplemental Figure 7.** Interaction relationships between OsRE1, OsRIP1 and several known *Ehd1* repressors.

(a) Y2H assay showed that OsRE1 interacts with DTH8, but not Hd1 or Ghd7. Yeast was grown at 30 °C for 3 days. The empty vector was used as a negative control.

(b) LCI assay showed that OsRE1 interacts with DTH8 in leaves of *N. benthamiana*. Hd1 was used as a negative control.

(c) Rhythmic expression patterns of *OsRE1* and *OsRIP1* in Nip, *ghd7* or *dth8* under LD conditions. Plants were grown in growth chambers under LD (14 h light /10 h darkness) conditions for 50 days. Black and white boxes denote dark and light periods, respectively. Rice *UBIQUITIN* gene was used as the internal control. Values are means  $\pm$  SD;  $n = 3$ . ZT, Zeitgeber time.

**Supplemental Table 1. Phenotypic data for Nipponbare, *Osrel* and *Osrip1* mutants.**

| Genotype      | Condition | Days to flowering | Plant height, cm | Tiller No. | Panicle length, cm | Primary branches per panicle | Secondary branches per panicle | Grains per panicle | 1000-grain weight, g |
|---------------|-----------|-------------------|------------------|------------|--------------------|------------------------------|--------------------------------|--------------------|----------------------|
| Nipponbare    | NLD       | 122.8±0.7         | 107.21±0.64      | 17.45±2.42 | 24.16±0.26         | 12.43±0.24                   | 29.29±0.44                     | 163.2±3.95         | 26.68±0.65           |
| <i>Osrel</i>  | NLD       | 118.1±1.7**       | 106.89±0.55      | 16.12±2.48 | 23.41±0.38*        | 11.88±0.11*                  | 26.47±0.62*                    | 156.8±3.31         | 26.58±0.45           |
| <i>Osrip1</i> | NLD       | 114.1±0.9**       | 106.42±0.88      | 16.19±2.82 | 23.95±0.45         | 12.36±0.18                   | 28.23±0.73                     | 160.2±5.35         | 26.37±0.48           |

Nipponbare, *Osrel* and *Osrip1* mutants were grown in the field under NLD conditions.

Values are means ± SD;  $n > 20$ . \*,  $P < 0.05$ , \*\*,  $P < 0.01$



**Supplemental Table 2. Primers used in this study.**

| <b>Primer (Forward)</b> | <b>Primer sequence</b>                                |
|-------------------------|-------------------------------------------------------|
| <b>Construction</b>     |                                                       |
| PB42AD-OsRE1-F          | TGCCTCTCCCGAATTCATGGCGGCAG                            |
| PB42AD-OsRE1-R          | CGAGTCGGCCGAATTCGCTCTTGGTGAA                          |
| LacZ-P1-F               | ATCTGTCGACCTCGAGTTAATTAAGATC                          |
| LacZ-P1-R               | GAGCACATGCCTCGAGTATTATAACCTA                          |
| LacZ-P2-F               | ATCTGTCGACCTCGAGTATTTATTTCT                           |
| LacZ-P2-R               | GAGCACATGCCTCGAGTAATGGTGGGT                           |
| LacZ-P3-F               | ATCTGTCGACCTCGAGAGTTTAAAACAC                          |
| LacZ-P3-R               | GAGCACATGCCTCGAGTATTATAACCTA                          |
| LacZ-P4-F               | ATCTGTCGACCTCGAGTATTTATTTCT                           |
| LacZ-P4-R               | GAGCACATGCCTCGAGTATTATAACCTA                          |
| OsRE1-Flag-F            | ACGATGATAAGGGCGGTACCATGGCGGCAG                        |
| OsRE1-Flag-R            | AGGCTACGTAGGATCCGCTCTTGGTGAA                          |
| OsRE1-CRISPR-F          | AGATGATCCGTGGCACCTCCTTCCTTGAGGTTGTG<br>TTTTAGAGCTATGC |
| OsRE1-CRISPR-R          | GCATAGCTCTAAAACACAACCTCAAGGAAGGAGG<br>TGCCACGGATCATCT |
| OsRIP1-Flag-F           | ACGATGATAAGGGCGGTACCATGAAGGTGCAG                      |
| OsRIP1-Flag-R           | AGGCTACGTAGGATCCTGCTTGTACTGG                          |
| OsRIP1-CRISPR-F         | AGATGATCCGTGGCACCCACGCCGCGTAACCGTC<br>GTTTTAGAGCTATGC |
| OsRIP1-CRISPR-R         | GCATAGCTCTAAAACGACGGTTACGCGGCGTGG<br>TGCCACGGATCATCT  |
| pAN580-OsRE1-F          | CCCGGGGATCCATGGCGGCAG                                 |
| pAN580-OsRE1-R          | CACCATGGATCCGCTCTTGGTGAA                              |

**Supplemental Table 2. Primers used in this study (Continued).**

| <b>Primer (Forward)</b> | <b>Primer sequence</b>      |
|-------------------------|-----------------------------|
| <b>Construction</b>     |                             |
| pAN580-OsRIP1-F         | CCCGGGGATCCATGAAGGTGCAG     |
| pAN580-OsRIP1-R         | CACCATGGATCCTGCTTGTACTGG    |
| pGAD-OsRE1-F            | GAGGCCAGTGAATTCATGGCGGCAG   |
| pGAD-OsRE1-R            | ACCCGGGTGGAATTCGCTCTTGGTGAA |
| pGAD-OsRIP1-F           | GAGGCCAGTGAATTCATGAAGGTGCAG |
| pGAD-OsRIP1-R           | ACCCGGGTGGAATTCTGCTTGTACTGG |
| pGAD-OsRIP1-1-F         | GAGGCCAGTGAATTCATGAAGGTGCAG |
| pGAD-OsRIP1-1-R         | ACCCGGGTGGAATTCGAGGGAGAATCG |
| pGAD-OsRIP1-2-F         | GAGGCCAGTGAATTCATGAAGGTGCAG |
| pGAD-OsRIP1-2-R         | ACCCGGGTGGAATTCGAGGAGGAACCG |
| pGAD-OsRIP1-3-F         | GAGGCCAGTGAATTCCAGAAGCCACCG |
| pGAD-OsRIP1-3-R         | ACCCGGGTGGAATTCTGCTTGTACTGG |
| pGAD-OsRIP1-4-F         | GAGGCCAGTGAATTCACCGGCGTGCGC |
| pGAD-OsRIP1-4-R         | ACCCGGGTGGAATTCTGCTTGTACTGG |
| pGAD-OsRIP1-5-F         | GAGGCCAGTGAATTCCAGAAGCCACCG |
| pGAD-OsRIP1-5-R         | ACCCGGGTGGAATTCGAGGAGGAACCG |
| pGAD-Hd1-F              | GAGGCCAGTGAATTCATGAATTATAAT |
| pGAD-Hd1-R              | ACCCGGGTGGAATTCGAACCATGGAAC |
| pGAD-Ghd7-F             | GAGGCCAGTGAATTCATGTCGATGGGA |
| pGAD-Ghd7-R             | ACCCGGGTGGAATTCTCTGAACCATTG |
| pGAD-DTH8-F             | GAGGCCAGTGAATTCATGAAGAGTAGG |
| pGAD-DTH8-R             | ACCCGGGTGGAATTCATTAGTATTCCT |
| pGBK-OsRE1-F            | ATGGAGGCCGAATTCATGGCGGCAG   |
| pGBK-OsRE1-R            | GATCCCCGGGAATTCGCTCTTGGTGAA |

**Supplemental Table 2. Primers used in this study (Continued).**

| <b>Primer (Forward)</b> | <b>Primer sequence</b>           |
|-------------------------|----------------------------------|
| <b>Construction</b>     |                                  |
| pGBK-OsRE1-1-F          | ATGGAGGCCGAATTCATGGCGGCGCAG      |
| pGBK-OsRE1-1-R          | GATCCCCGGGAATTCGCCGGCGCTCCG      |
| pGBK-OsRE1-2-F          | ATGGAGGCCGAATTCGACAAGGAGCAG      |
| pGBK-OsRE1-2-R          | GATCCCCGGGAATTCGCTCTTGGTGAA      |
| pGBK-OsRE1-3-F          | ATGGAGGCCGAATTCATGGCGGCGCAG      |
| pGBK-OsRE1-3-R          | GATCCCCGGGAATTCCGTGTTCTTGAG      |
| pGBK-OsRE1-4-F          | ATGGAGGCCGAATTCACGGCGCACGCC      |
| pGBK-OsRE1-4-R          | GATCCCCGGGAATTCGCTCTTGGTGAA      |
| pGBK-OsRE1-5-F          | ATGGAGGCCGAATTCGACAAGGAGCAG      |
| pGBK-OsRE1-5-R          | GATCCCCGGGAATTCCGTGTTCTTGAG      |
| YNE-OsRE1-F             | AGTGGAGGATCCATGGCGGCGCAG         |
| YNE-OsRE1-R             | ACCTCCGGATCCGCTCTTGGTGAA         |
| YCE-OsRIP1-F            | CGTAGTCACGTGATGAAGGTGCAG         |
| YCE-OsRIP1-R            | GGACGTCACGTGTGCTTGTACTGG         |
| His-OsRE1-F             | GGCTGATATCGGATCCATGGCGGCGCAG     |
| His-OsRE1-R             | GACGGAGCTCGAATTCGCTCTTGGTGAA     |
| MBP-OsRIP1-F            | TTCAGAATTCGGATCCATGAAGGTGCAG     |
| MBP-OsRIP1-R            | CGACTCTAGAGGATCCTGCTTGTACTGG     |
| OsRE1-GFP-F             | CGAGCTGTACAGATCTATGGCGGCGCAG     |
| OsRE1-GFP-R             | GCCAAATGTTTGAAGTGCAGGCTCTTGGTGAA |
| nLUC-OsRE1-F            | GGTACCCGGGATCCATGGCGGCGCAG       |
| nLUC-OsRE1-R            | GAGATCTGGTCGACGCTCTTGGTGAA       |
| cLUC-OsRIP1-F           | CCCGGGGCGGTACCATGAAGGTGCAG       |
| cLUC-OsRIP1-R           | CTCTGCAGGTCGACTGCTTGTACTGG       |

**Supplemental Table 2. Primers used in this study (Continued).**

| <b>Primer (Forward)</b>                    | <b>Primer sequence</b>        |
|--------------------------------------------|-------------------------------|
| <b>Construction</b>                        |                               |
| pGreen-Ehd1-F                              | AGATCGAATTCCATGGTATTTATTTTCCT |
| pGreen-Ehd1-R                              | TTGGCGTCTTCCATGGTATTATAACCTA  |
| <b>Transgenic plant DNA identification</b> |                               |
| DT-OsRE1-Flag-F                            | CAGGAGAAGCAGCAGGTGAA          |
| DT-OsRE1-Flag-R                            | TGAAATGGTGCTTCTTCCCG          |
| DT-OsRIP1-Flag-F                           | GATTCTCCCTCCTCCAACCG          |
| DT-OsRIP1-Flag-R                           | TCACCAGTACAAGCAGGGAG          |
| DT-Osre1-F                                 | CAGGAGAAGCAGCAGGTGAA          |
| DT-Osre1-R                                 | CCTGCCGCCACCGAATCG            |
| DT-Osrip1-F                                | TCACGAGCAGATTGTTCCCT          |
| DT-Osrip1-R                                | GATTCATCCAAGACACGCGT          |
| <b>ChIP-qPCR</b>                           |                               |
| Ehd1-S1-F                                  | AGTCAACATGCATGCCTTACTC        |
| Ehd1-S1-R                                  | TGTGTTAATTTGTAGAGGGACGT       |
| Ehd1-S2-F                                  | CCGTGTTTGATCCGATTCCA          |
| Ehd1-S2-R                                  | TGCGCGCTTTTGTAGTTTGA          |
| Ehd1-S3-F                                  | GTGAAATTGACCGGTGGCC           |
| Ehd1-S3-R                                  | TTCATAGACGACACACCTCA          |
| Ehd1-S4-F                                  | GATCAACATTTCTCAGCAAAGGA       |
| Ehd1-S4-R                                  | CCAGGCAAAACAAACCAAACA         |
| Ehd1-S5-F                                  | TGCGGTTTCTAGGGTTAGCA          |
| Ehd1-S5-R                                  | CGAACACAACCTTTTCCCGGT         |
| <b>RT-qPCR</b>                             |                               |
| UBQ-F                                      | GCTCCGTGGCGGTATCAT            |
| UBQ-R                                      | CGGCAGTTGACAGCCCTAG           |

**Supplemental Table 2. Primers used in this study (Continued).**

| <b>Primer (Forward)</b> | <b>Primer sequence</b>     |
|-------------------------|----------------------------|
| qEhd1-F                 | AACCCGGTCATCCTCCAT         |
| qEhd1-R                 | TCATCTCTCACCTCATTTTCT      |
| qOsRE1-F                | AACAACACGCTCCGCCAGATAC     |
| qOsRE1-R                | TTGGTGAAATGGTGCTTCTTCCC    |
| qOsRIP1-F               | ATCTCCGAGTACCTCACCAAGAC    |
| qOsRIP1-R               | ACCCTGAAATAGCCCGTCTGAG     |
| qHd1-F                  | CGTTTCGCCAAGAGATCAG        |
| qHd1-R                  | AGATAGAGCTGCAGTGGAGAAC     |
| qEhd2-F                 | CGACGACAATAGCTCGATCGC      |
| qEhd2-R                 | GTGCATGGTCACGGAGCCTT       |
| qEhd3-F                 | GACCACCTCGTCACCTACAAG      |
| qEhd3-R                 | GAGTGTCCCTCCAGCTAATCC      |
| qEhd4-F                 | CAGCCAGCGGAATCATCAC        |
| qEhd4-R                 | CCAAATCCATCAGACCTACTCCT    |
| qHd3a-F                 | GCTCACTATCATCATCCAGCATG    |
| qHd3a-R                 | CCTTGCTCAGCTATTTAATTGCATAA |
| qMADS14-F               | CAACCTCAAACAAGTTCCTC       |
| qMADS14-R               | TGCTGCTACATCCTCTATCC       |
| qDTH8-F                 | CAGGAGTGCGTGTCGGAGTT       |
| qDTH8-R                 | GGTCGTCGCCGTTGATGGT        |
| qRFT1-F                 | TGACCTAGATTCAAAGTCTAATCCTT |
| qRFT1-R                 | TGCCGGCCATGTCAAATTAATAAC   |
| qGhd7-F                 | GCTTGAACCCAAACACGG         |
| qGhd7-R                 | CTCATCTCGGCATAGGCTT        |

**Supplemental Table 3. Detailed information for rice BBX family members.**

| <b>Gene name</b> | <b>Gene ID in phytozome</b> | <b>Gene name</b> | <b>Gene ID in phytozome</b> |
|------------------|-----------------------------|------------------|-----------------------------|
| <i>OsBBX1</i>    | <i>LOC_Os01g10580</i>       | <i>OsBBX16</i>   | <i>LOC_Os06g05890</i>       |
| <i>OsBBX4</i>    | <i>LOC_Os02g39360</i>       | <i>OsBBX22</i>   | <i>LOC_Os06g49880</i>       |
| <i>OsBBX6</i>    | <i>LOC_Os02g43170</i>       | <i>OsBBX29</i>   | <i>LOC_Os09g35880</i>       |
| <i>OsBBX7</i>    | <i>LOC_Os02g49230</i>       | <i>OsBBX30</i>   | <i>LOC_Os12g10660</i>       |
| <i>OsBBX11</i>   | <i>LOC_Os04g41560</i>       | <i>OsRIP1</i>    | <i>LOC_Os04g45690</i>       |
| <i>OsBBX14</i>   | <i>LOC_Os05g11510</i>       |                  |                             |
